# Supplementary material
Source: PubMed Central journal article supplement (PMC4449144)
Supplement: NIHMS683706-supplement-Supp_Material.pdf [file NIHMS683706-supplement-Supp_Material.pdf]

DNA sequence of insert in pME31.

1 AGGCGATTGG GCCCXbaI TAAATGTGGTG GCGACCTCAG AGTCATCGCA ACAAGCCAAT  
61 GCAATCCGTG AGCACGCAAC GCAAAACCCA GCAGCGCAGA ATGCTCTATC CGATAAAGAG  
121 CGTGCAGAAG CGGATCGCCA ACGTCTTGAA CAAGAAAAGC AGAAACAGCT TGATGCTGTC  
181 GCAGGGTCAC AAAGTCAGTT GGAGTCGACC GACCAACAAG CGCTAGAAAA TAATGGTCAA  
241 GCTCAACGTG ATGCGGTGAA AGAAGAGTCG GAAGCCGTGA CCGCCGAGTT GGCAAAACTG  
301 GCGCAAGGTC TCGATGTGCT TGATGGCCAA GCAACGCATA CTGGCGAGTC CGGCGACCAA  
361 TGGCGCAATG ATTTTGCCGG TGGTCTGCTC GATGGCGTTC AAAGCCAGCT CGACGATGCC  
421 AAGCAACTCG CGAATGACAA GATTGCTGCA GCGAAGCAGA CCCTGTCTGA CAATAACAGC  
481 AAAGTCAAAG AATCCGTTGC GAAATCTGAA GCGGGTGTGG CACAAGGCGA GCAAAATCGA  
541 GCGGGAGTAG AGCAAGACAT TGCTGATGCT CAAGCCGATG CTGAAAAACG TAAAGCCGAT  
601 GCTTTAGCAA AAGGTAAGGA TGCACAACAA GCGGAATCTG ATGCACATCA TGCGGTAAAT  
661 AATGCTCAAT CACGCGGCGA TCGTGATGTG CAATTGGCGG AAAACAAAGC CAACCAAGCA  
721 CAAGCCGATG CTCAAGGTGC TAAACAAAAC GAAGGTGATC GTCCTGATCG TCAAGGCGTG  
781 ACTGGTAGTG GCCTTTCGGG TAAATGCTCAT AGTGTGGAAG GCGCTGGCGA AACAGACAGT  
841 CATGTCAACA CCGACAGCCA AACCAACGCC GATGGCCGAT TCAGTGAAGG TTTAACCGAA  
901 CAAGAGCAAG AAGCGCTAGA AGGTGCGACC AACGCAGTGA ACCGTTTGCA AATTAACGCA  
961 GGTATTCGAG CGAAAAACAG CGTTAGCAGT ATGACTTCTA TGTTCTCTGA AACAAATAGC  
1021 AAGAGCATTG TTGTTCTTAC CAAAGTCTCG CCTGAACCAG AGCGCCAAGA AGTGACTCGT  
1081 AGAGACGTCC GTATCTCAGG GGTGAACCTC GAAAGTCTAA GTGCGGTACA GGGAAAGTCAA  
1141 CCAACCCAGA AACGCTGGAA GAAGGGC GAA TTCGCCCTTC ACCCAGAAAC GCTGGTGAAA  
1201 GTAAAAGATG CTGAAGATCA GTTGGGTGCA CGAGTGGGTT ACATCGAACT GGATCTCAAC  
1261 AGCGGTAAGA TCCTTGAGAG TTTTCGCCCC GAAGAACGTT TTCCAATGAT GAGCACTTTT  
1321 AAAGTTCTGC TATGTGGCGC GGTATTATCC CGTGTTGACG CCGGGCAAGA GCAACTCGGT  
1381 CGCCGCATAC ACTATTCTCA GAATGACTTG GTTGAGTACT CACCAGTCAC AGAAAAGCAT  
1441 CTTACGGATG GCATGACAGT AAGAGAATTA TGCAGTGCTG CCATAACCAT GAGTGATAAC  
1501 ACTGCGGCCA ACTTACTTCT GACAACGATC GGAGGACCGA AGGAGCTAAC CGCTTTTTTG  
1561 CACAACATGG GGGATCATGT AACTCGCCTT GATCGTTGGG AACCGGAGCT GAATGAAGCC  
1621 ATACCAAACG ACGAGCGTGA CACCACGATG CCTGCAGCAA TGGCAACAAC GTTGCGCAAA  
1681 CTATTAAC TGCGAACTACT TACTCTAGCT TCCCGGCAAC AATTAATAGA CTGGATGGAG  
1741 GCGGATAAAG TTGCAGGACC ACTTCTGCGC TCGGCCCTTC CGGCTGGCTG GTTTATTGCT  
1801 GATAAATCTG GAGCCGGTGA GCGTGGGTCT CGCGGTATCA TTGCAGCACT GGGGCCAGAT  
1861 GGTAAGCCCT CCCGTATCGT AGTTATCTAC ACGACGGGGA GTCAGGCAAC TATGGATGAA  
1921 CGAAATAGAC AGATCGCTGA GATAGGTGCC TCACTGATTA AGCATTGGGT GGTGGATAGT  
1981 AAAGAAGCA TAGCGGATGG AAAAATACTC CATAATCAAA ATGTTAATAG CTGGGGCCCG  
2041 ATTACGGTTA CACCAACGAC AGATGGTGGT GAAACCCGCT TCGACGGTCA AATCATCGTT  
2101 CAAATGGAAA ACGACCCGGT AGTAGCAAAA GCGGCAGCCA ATTTAGCAGG TAAACATGCT  
2161 GAAAGCAGTG TGGTGGTGCA GCTCGATTCA GACGGCAACT ATCGCGTGGT GTATGGCGAT  
2221 CCGTCAAAAAC TGGATGGAAA GCTACGTTGG CAGTTGGTGG GGCATGGTTCG CGACCACTCA  
2281 GAAACTAACA ATACTCGCTT AAGTGGTTAC AGTGCCGATG AGTTGGCCGT GAAATTGGCC  
2341 AAGTTCCAAC AGTCGTTTAA TCAAGCCGAA AACATCAACA ACAAACCGGA TCACATCAGT  
2401 ATTGTTGGTT GTTCTTTGGT GAGTGACGAC AAGCAAAAAG GCTTTGGTCA TCAGTTTATT  
2461 AACGCGATGG ATGCGAATGG TCTTCGTGTC GATGTCTCTG TTCGTAGTTC TGAAGTGGCC  
2521 GTAGACGAGG CGGGACGTAA GCATACCAAG GACGCGAATG GCGATTGGGT TCAAAAGGCA  
2581 GAAAACAACA AAGTTTCGCT AAGCTGGGAC GCGCAAGGTG AAGTTGTTGC CAAGGATGAA  
2641 CGTATTCGCA ATGGTATTGC GGAAGGCGAC ATCGATCTCT CTCGTATTGG TGTCACAACAT  
2701 GTCGATGAAC CTGCTCGTGG CGCGATCGGT GACAATAATG ACGTGTGTTGA TGCGCCAGAA  
2761 AAACGCAAAC CAGAAACGGA AGTGATTGCC AATTCTAGCA GCAGTAATCA ATTCAGCTAC  
2821 TCAGGTAACA TTCAAGTTAA CGTGGGCGAA GGGGAGTTTA CCGCGGTGAA CTGGGGGACA  
2881 TCGAATGTGG GCATTAAGT CGGTACTGGT GGCTTTAAAT CGCTGGCCTT TGGTGACAAT  
2941 AACGTTATGG TTCATATCGG TGACGGTGAA AGCAAAACACA GTGTTGATAT CCGTGGCTAT  
3001 CAAGCACTGG AAGGTGCGCA AATGTTCTC GGTAAACCGTA ATGTGAGCTT TAATTTCCGA  
3061 CACAGTAATG ATCTGATCCT AATGATGGAT AAGTCGATCC CAACTCCACC ACTCGTCAAT  
3121 CCATTGAGCT GGTACCAAG CTTGATGCAT AGCTTGAGTA TCTATAGGCA CC  
SacI

rtxA homology  
upstream of acd

Cleavage site codons L/S  
at 5' border of acd  
EcoRI

TEM-1 bla

Cleavage site codons L/A  
at 5' border of cpd

rtxA homology  
covering the cpd
